# Supplementary material for: Overexpression of a Gene Encoding Trigonelline Synthase from Areca catechu L. Promotes Drought Resilience in Transgenic Arabidopsis
Source: MDPI journal article supplement (doi:10.3390/plants11040487), 2022-02-11
Supplement: s1 [file s1]

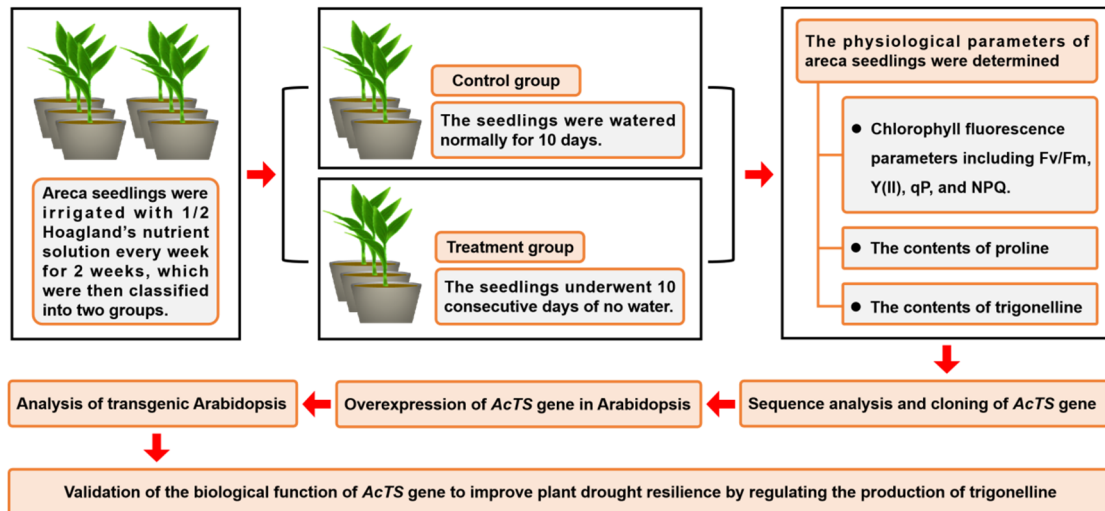

Supplementary Figure S1. The flow chart of this study

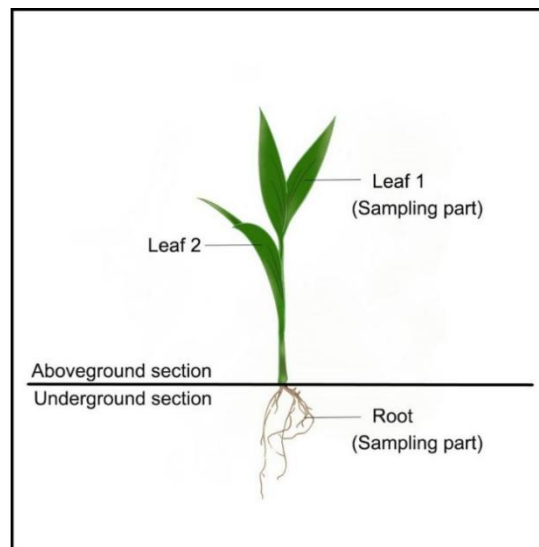

Supplementary Figure S2. Schematic diagram of areca seedling. The roots and the first leaf from the top of each seedling were collected at 0, 2, 4, 6, 8 and 10 days after treatment, which were immediately frozen in liquid nitrogen and stored at -80 °C until use.

**A**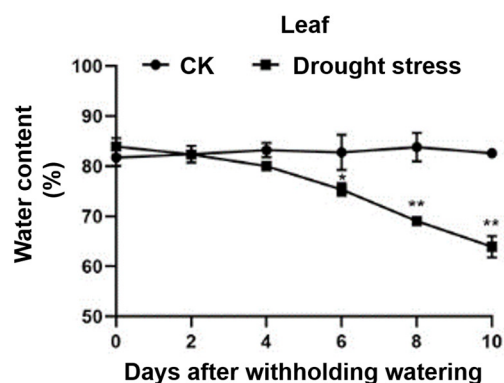**B**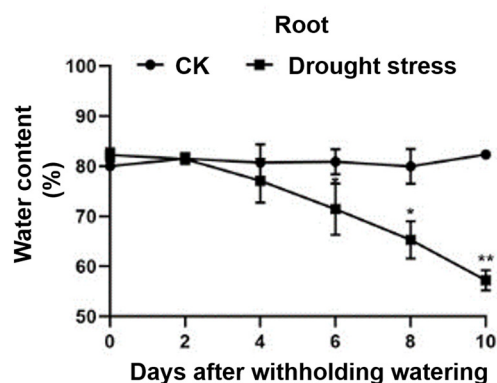

Supplementary Figure S3. The water content in the leaf and root of areca seedling. \*: P value < 0.05; \*\*: P < 0.01.

Supplementary Table S1. The primers used for PCR

| Primer name       | Primer direction | Primer sequences                                |
|-------------------|------------------|-------------------------------------------------|
| AcTS(KpnI)-1300F  | Forward primer   | GGGGTACCATGGGGTTGAACG<br>TAGAGCAAGTTTTTCA       |
| AcTS(BamHI)-1300R | Reverse primer   | CGGGATCCTCACATTTTTGTCT<br>TCAAAGAGATGACAAAAACAG |

Note: The underlined sequences represent restriction enzyme sites, namely KpnI and BamHI.

Supplementary Table S2. The primers used for qRT-PCR

| Gene name    | Primer direction | Primer sequences     | Product length (bp) |
|--------------|------------------|----------------------|---------------------|
| <i>AcTS</i>  | Forward          | TGCTCTTCCGGTCCAAACAC | 228                 |
|              | Reverse          | GCCAGGCACTCCCACAACAT |                     |
| <i>Actin</i> | Forward          | GTATCGTGCTTGATTCTGG  | 167                 |
|              | Reverse          | GCTACTCTTGGCTGTCTCC  |                     |

### Supplementary seq 1. The full length CDS sequences of *AcTS*

ATGGGGTTGAAGGTAGAGCAAGTTTTTCACATGGTTGGAGGGGCTGGAGAGACCAGCTACGCC  
ACCAACTCCAGGCTTCAAGAGAAGGCAATATTTGAAGCAAAGCCCATAGTGGAGGAGGCCGTG  
AGAGAGGTCTATAAGACTGTCCTGCCTGAGAGCATGGTGGCGGCTGACTTGGGTTGCTCTTCCG  
GTCCAAACACATTTACGTGGTCTTCGAGGTGATCGATATCGTCGACGATCAGAGCCGAAGGCT  
GGGACGGCCCCCGCCGGAGATCCAGTTCTTCTTGAACGATCTCCCGGGGAATGACTTCAACAAT  
ATTTTTCAGTCTTTGGAAGGATACGAGAAGAAATTAAAGGAAGAGAAGGGAGAGCGGATTCTG  
CCGTTCTATGTTGTGGGAGTGCCTGGCTCTTCTATGGTAGGCTTTCCCTCTGGAAGCGTTCAT  
TTCTTCCATTCTTCTACTGTCTCATGTGGCTCTCCAGGTTCTGCGGGAGTTGAGAGTAACAC  
CGGTGTTCCATTAAATGAGGGAAACATCTACATATGGGAGACAAGTCCACCTAGTGTGGTGAAA  
GCATATCAAGAGCAATACCGGAGGGACTTCACCACTTTTCTCGAGTCCCGTTTCCAAGAACTCA  
GTTTCGGAGGACGAATGGTCTTAACATTTTTGGGAAGGACGAGCAAAGATGCACGAAGTGGAG  
AACTGAGCAAGCTTTGGGGACAACCTGGCTGAGGCATTCAATGCTATGGTCCTAGAGGGTATCAT  
ACAAAAGGAAAAGGTGGATGCATTCAATGTGCCTTTTTATGCACCTTCCATGGAGGAAGTGAAG  
GCAGTGATACAAAGCGTAGGATTATTTGATCTCGATCGAGTACAAATATTCAAGTCAAACCTGGG  
ATCCACTTGATGACTCTACTGATGATTACGTACATGATAATTTCTAAGCGGGAACAATGCGGCA  
AAGACTATGAGAGCAGTGATGGAACCCGTGATTGAACGTCACTTTGGGGAGCACATACTTGATG  
ATTTGTTTTCAAGATATGCAAAAAATGTCGCAAGGCACCTCTTGAAGGAGAAGACCAAGCATCC  
TGTTTTTGTCATCTCTTTGAAGACAAAAATGTGA

### Supplementary seq 2. Amino acid sequences of *AcTS*

MGLKVEQVFHVMVGAGETSYATNSRLQEKAIFEAKPIVEEAVREVYKTVLPESMVAADLGCSSGPNTF  
HVVFVIDIVDDQSRRLGRPPPEIQFFLNDLPGNDFNNIFQSLEGYEKKLKEEKGERILPFYVVGVPGSF  
YGRLFPSGSVHFFHSSYCLMWLSQVPAGVESNTGVPLNEGNIYIWETSPPSVVKAYQEYRRDFTTFL  
ESRFQELSFGRMVLTLGRTSKDARSGELSKLWGQLAEAFNAMVLEGIIQKEKVDAFNVPFYAPSME  
EVKAVIQSVGLFDLDRVQIFKSNWDPLDDSTDDYVHDNFLSGNNAAKTMRAVMEPVIERHFGEHIL  
DDLFSRYAKNVARHLLKEKTKHPVFVISLTKM\*

### Supplementary seq 3. The full length CDS sequences of *CaTS1*

ATGGAGCTCCAAGAAGTCCTGCATATGAATGGAGGCGAAGGCGATGCAAGCTACGCCAAGAAT  
TCATCCTTCAATCAACTGGTTCTCGCCAAGGTGAAACCTGTCCTTGAACAATGCGTAGGGGAATT  
GTTGCGGGCCAACCTGCCCAACATCAACAAGTGCATTAAAGTTGCGGATTTGGGATGCGCTTCC

GGACCAAACACACTTTTAAACAGTTCGGGACATTGTACAAAGTATTGACAAAGTTAGGCAAGAAA  
TGAAGAATGAATTAGAACGTCCCACCATTGAGGTTTTCTGACTGATCTTTTCCAAAATGATTTC  
ATTCGGTTTTTCATGTTGCTGCCAAGTTTCTACCGCAAACCTTGAGAAAGAAAATGGACGCAAGAT  
AGGATCGTGCCTAATAGCCGCAATGCCTGGCTCTTCCACGGCAGACTCTTCCCCGAGGAGTCA  
ATGCATTTTTTACACTCTTCTTACAGTCTTCAATTTTTATCCCAGGTTCCCAGCGGTTTGGTGACTG  
AATTGGGGATCACTGCGAACAAAAGGAGCATTTACTCTTCCAAAGCAAGTCCTCCGCCCGTCCA  
GAAGGCAAATTTGGATCAATTTACGAAAGATTTTACCACATTTTTAAGGATTCGTTGGAAGAGT  
TGCTTTCACGCGGCCGAATGCTCCTTACTTGCAATTTGCAAAGGAGATGAATTCGACGGCCCGAA  
TACCATGGACTTACTTGAGATGGCAATAAACGACTTGGTTGTTGAGGGACATCTGGAGGAAGAA  
AAATTGGACAGTTTCAATGTTCCAATCTATGCAGCTTCAGTAGAAGAATTAAAGTGCATAGTTGA  
GGAGGAAGGTTCTTTGAAATTTGTACTTGGAGACTTTTAAGCTCCGTTATGATGCTGGCTTCTC  
TATTGATGATGATTGCCAAGTAAGATCCCATTCCCCAGAATACAGCGATGAACATGCTAGAGCA  
GCGCATGTGGCATCATTACTTAGATCAGTTTACGAACCCATCCTCGCAAATCATTTTGGAGAAGC  
TATTATACCTGACATATTCCACAGGTTTGGCAGCAATGCAGCAAAGGTTATCCGCTTGGGCAAA  
GGCTTCTATAATAATCTTATCATTTCTTGGCAAAAAACCAGAGAAGTCAGACATATAA

#### **Supplementary seq 4. Amino acid sequences of *CaTS1***

MELQEVLHMNGGEGDASYAKNSSFNQLVLAKVKPVLEQCVGELLRANLPNINKCIKVADLGCASGP  
NTLLTVRDIVQSIDKVRQEMKNELEPRTIQVFLTDLFQNDFNSVFMLLPSFYRKLEKENGRIKIGSCLIAA  
MPGSFHGRLFPEESMHFLHSSYSLQFLSQVPSGLVTELGITANKRSIYSSKASPPPQKANLDQFTKDF  
TTFLRIRSEELLSRGRMLLTICKGDEFDGPNTMDLLEMAINDLVVEGHLEEEKLDSFNVPIYAASVEELK  
CIVEEEGSFEILYLETFKLRYDAGFSIDDDCQVRSHSPEYSDEHARAAHVASLLRSVYEPILANHFGEAIIP  
DIFHRFATNAAKVIRLGKGFYNNLIISLAKKPEKSDI

#### **Supplementary seq 5. The full length CDS sequences of *CaTS2***

ATGGAGCTCCAAGAAGTCCTGCATATGAATGGAGGCGAAGGCGAAGCAAGCTACGCCAAGAA  
TTCATCCTTCAATCAACTGGTTCTCGCCAAGGTGAAACCTGTCCTTGAACAATGCGTACGGGAAT  
TGTTGCGGGCCAACCTGCCCAACATCAACAAGTGCATTAAAGTTGCAGATTTGGGATGCGCTTC  
CGGACCAAACACACTTTTAAACGTTTGGGACACTGTACAAAGTATTGACAAAGTTAGGCAAGAA  
ATGAAGAATGAATTAGAACGTCCCACCATTGAGGTTTTCTGACTGATCTTTTCCAAAATGATTTC  
AATTCGGTTTTTCATGCTGCTGCCAAGCTTCTACCGCAAACCTTGAGAAAGAAAATGGACGCAAAA  
TAGGATCGTGCCTAATAGCCGCAATGCCTGGCTCTTCCACGGCAGACTCTTCCCCGAGGAGTC

CATGCATTTTTTACACTCTTCTTACAGTCTTCAGTTTTTATCCCAGGTTCCCAGCGGTTTGGTGACT  
GAATTGGGGATCACTGCGAACAAAAGGAGCATTTACTCTTCAAAGCAAGTCCTCCGCCCCGTCC  
AGAAGGCATATTTGGATCAATTTACGAAAGATTTTACCACATTTTTAAGGATGCGTTCGGAAGAG  
TTGCTTTCACGTGGCCGAATGCTCCTTACTTGCAATTTGTAAAGGAGATGAATGCGACGGCCCCGA  
ATACCATGGACTTACTTGAGATGGCAATAAACGACTTGGTTGCTGAGGGACGTCTGGGGGAAG  
AAAAATTGGACAGTTTCAATGTTCCAATCTATACAGCTTCAGTAGAAGAAGTAAAGTGCATGGTT  
GAGGAGGAAGGTTCTTTTGAATTTTATACTTGACAGCTTTTAAGCTCCGTTATGATGCTGGCTTC  
TCTATTGATGATGATTGCCAAGTAAGATCCCATTCCCCAGTATACAGCGATGAACATGCTAGAG  
CAGCGCATGTGGCATCATTAATTAGATCAGTTTACGAACCCATCCTAGCAAGTCATTTTGGAGAA  
GCTATTATACCTGACATATTCCACAGGTTTGCAGCAATGCAGCAAAGGTTATCCGCTTGGGCA  
AAGGCTTCTATAATAATCTTATCATTTCTCTTGCCAAAAAACCAGAGAAGTCAGACATATAA

#### **Supplementary seq 6. Amino acid sequences of CaTS2**

MELQEVLHMNGGEGEASYAKNSSFNQLVLAKVKPVLEQCVRELLRANLPNINKCIKVADLGCASGP  
NTLLTVWDTVQSIDKVRQEMKNELERPTIQVFLTDLFQNDFNSVFMLLPSFYRKLEKENGSRKIGSCLIA  
AMPGSFHGRFLPEESMHFLHSSYSLQFLSQVPSGLVTELGITANKRSIYSSKASPPPVQKAYLDQFTKD  
FTTFLMRSEELLSRGRMLLTICKGDECDGPNTMDLLEMAINDLVAEGRLGEEKLDSFNVPIYTASVE  
EVKCMVEEEGSFEILYLQTFKLRYDAGFSIDDDCQVRSHSPVYSDEHARAAHVASLIRSVEPIILASHFG  
EAIIPDIFHRFATNAAKVIRLGKGFYNNLIISLAKKPEKSDI\*

#### **Supplementary seq 7. The full length CDS sequences of *AtTS***

ATGGAGAACGAAAGCTCAGAGAGTAGAAACAGAGCTCGTCTTGCCATTATGGAGCTTGCTAAC  
ATGATTAGCGTTCCCATGTCTCTCAATGCCGCCGTGCGACTAGGCATTGCCGACGCCATTTGGA  
ACGGCGGAGCCAATTCTCCTCTCTCTGCCGCCGAGATCCTCCCTCGCCTCCACCTACCATCTCA  
CACTACCATTGGTGGCGACCCCGAGAATCTTCAGCGTATACTTCGGATGCTCACCAGCTACGGT  
GTCTTCTCCGAACACCTTGTTGGATCCATTGAGAGGAAATACTCTCTTACGGACGTCGGAAAAA  
CTCTTGTAACCGACTCCGGCGGCCTCTCTTACGCTGCCTACGTCCTCCAACATCACCAGGAGGC  
GTTGATGCGAGCATGGCCACTAGTTCACACGGCAGTGGTGGAGCCGGAGACAGAGCCGTACGT  
GAAAGCAAACGGCGAGGCGGCATACGCTCAGTATGGGAAAAGTGAGGAGATGAATGGTCTAA  
TGCAAAAGGCAATGTCTGGCGTATCTGTACCGTTCATGAAAGCTATATTAGACGGCTACGATGG  
GTTTAAATCAGTGGATATTTTGGTTGACGTAGGAGGTAGTGCAGGGGATTGTCTGCGTATGATCC

TTCAACAATTCCTAACGTCCGTGAAGGGATTAATTTGATTACCTGAAGTTGTTGCCAAAGCC  
CCCAATATTCCTGGAGTGACTCACGTGGGTGGGGATATGTTCCAATCAGTTCCTAGCGCTGACG  
CTATCTTCATGAAGTGGGTGTTAACGACATGGACGGATGAAGAATGCAAGCAGATAATGAAGA  
ATTGCTACAACGCGTTACCAGTTGGAGGAAAGCTGATTGCGTGTGAGCCGGTCTTGCCTAAGGA  
AACCGATGAAAGTCACCGGACTCGTGCCTTGTTAGAAGGTGACATCTTTGTCATGACCATCTATA  
GAACCAAAGGTAAGCATAGAACCGAAGAAGAGTTTATAGAGCTTGGTCTCTCCGCGGGATTCC  
CTACTTTTCGACCTTTCTACATTGATTACTTCTACACCATCTTAGAGTTTCAGAAGTAA

#### **Supplementary seq 8. Amino acid sequences of AtTS**

MENESSESRRNRLAIMELANMISVPMSLNAAVRLGIADAIWNGGANSPLSAAEILPRLHLPSTHTIG  
GDPENLQRILRMLTSYGVFSEHLVGSIERKYSLTDVGKTLVTDSGGLSYAAYVLQHHQEALMRAWPLV  
HTAVVEPETEPYVKANGEAAYAQYKGSEEMNGLMQKAMSGVSVPFMKAILDGYDGFKSVDILVDVG  
GSAGDCLRMILQQFPNVREGINFDLPEVVAKAPNIPGVTHVGGDMFQSVPSADAIFMKWVLTTWTD  
EECKQIMKNCYNALPVGGKLIACEPVLPKETDESHRTRALLEGDIFVMTIYRTKGKHRTEEEFIELGLSAG  
FPTFRPFYIDYFYTILEFQK\*

#### **Supplementary seq 9. The full length CDS sequences of *GmTS***

ATGGAGAAAGAGGAGAGCACGGAACAGCGAAAGCAAGCGAGGCTTGCCATTATGGAGCTCGC  
CAACATGATAAGCGTTCCCATGGCGCTAAACGCCGTCGTCGCCTCAACGTCGCCGACGCCATC  
TGGCAAGGCGGCGCCAACAACCCCTCTCCGCCGCTGAGATCCTCCCCCGCCTCCTCCCGCC  
GGCGGCGGCGACGCCGAGAACCTCCAGCGGCTCCTCCGGATGCTGGCCAGTTACGGCGTCTTC  
TACGAGCACCTCTCCGCCGGCGAGCGGAAGTACTCCCTACCGACGTCGGCAAAACGCTTGTC  
ACCGATGAACAAGGCCTGTCGTACGCGCATTACGTGCTCCAACACCACCAGGATGCGTTGATG  
AGAGCGTGGCCAATGGTGCACGAGGCAGTAGTGGACCCTACAAAGGAGCCCTTCGAGAGGGC  
AAATGGGGAGCCAGCATATGGATACTATCTGAAGCACCCAGAGATGAATGACCTAATGGTGAG  
GGCCATGTCAGGGGTGTCAGTGCCCTTCATTAGGGCCATGTTGGAGGGCTATGATGGCTTTCAA  
GGTGTGGAGAAGCTTGTGGATGTGGGTGGTAGTGGCGGTGATTGCCTTCGTATGATCTTGAAA  
AACACCCCAACCATCAAAGAAGGGATCAACTTTGACCTACCTGAAGTTGTGGCCAAAGCCCCAC  
AAATCCCATTGTGAACCCATGTGGGTGGTGACATGTTCAAGTTTATTCCCCAAGGAGATGCTATC  
TTCATGAAGTGGGTGCTAACAACATGGACTGATGAAGAATGCAAGCACATAATGCAGAACTGTC  
ACAAGGCACTCCCTGAGGGAGGAAAATAAGCATGTGAGCCAGTGCTCCCGGAGGACTCAG  
ACGAGAGTCACAGAACGAGGGCATTGCTTGAAGGTGACATTTTTGTGATGACAATCTACAGAGC

CAAAGGGAAGCACAGGACTGAAGAACAGTTCAGGCAATTAGCCATTGATGCAGGCTTCCCTCG  
TTTCAGAGCCTTCCATGTTGACCATTTCTACACTGTCCTTGAGTTTCAGAAATGA

#### **Supplementary seq 10. Amino acid sequences of GmTS**

MEKEESTEQRKQARLAIMELANMISVPMALNAVRLNVADAIWQGGANNPLSAAEILPRLLPAGGG  
DAENLQRLRLMLASYGVFYEHLASAGERKYSLTDVGKTLVTDEQGLSYAHYVLQHHQDALMRAWPM  
VHEAVVDPTKEPFERANGEPAYGYLKHPEMNDLMVRAMSGVSVPFIRAMLEGYDGFQGVKLVDP  
GGSGGDCLRMILEKHPTIKEGINFDLPEVVAKAPQIPFVTHVGGDMFKFIPQGDAIFMKWVLTWTDE  
ECKHIMQNCHKALPEGGKLIACEPVLPEDSDESHRTRALLEGDIFVMTIYRAKGKHRTEEQFRQLAIDA  
GFPRFRAFHVDFHYTVLEFQK\*

#### **Supplementary seq 11. The full length CDS sequences of OsTS**

ATGGGCGGCGGAGGAGACGGCGAACTGTCCCCGGCGGAGGCCAGGCTGGCGATGATGGAGCT  
CGCCAACATGATCTCCGTCCCCATGGCGCTCACCGCCGTCATCCGCCTCGGCGTCCCCGCCAA  
GCTCTGGGCGGGAGGCGCCAACGCCCCGCTCGCCGCCGCCGACCTCCTCCCCGCGGGCCACC  
CGGACCCCTCCGTCTCGAGCGCCTCCTCCGCCTCCTCGCCTCCCGCGGCGTCTTCTCCGAGCA  
CACCGGATCATCCTCCCCCTCCCCGCGCCGCTTCTCGCTCACCGCCGTCGGCCGCACCCTCGTC  
CCCGGCGGCGGCGGTAGCCCCTCCGGCTCCGGCGCGTCCTACGCCGACTACGTTCTGCAGCAC  
CACAGGATGCGCTCGTCCGCGCCTGGCCCCTCCTCCACGAGGCCGTCCTCGACCCCTCCGGC  
CCCGAGCCCTTCGCCCCGCGCCAACGCCGGCGTCCCCGCCTACGCCTACTACGGCAAGGACAG  
GGAGGCGAACGAGGTGATGCTCCGGGCGATGACGGGGGTGTGGAGCCGTTTCATGGAGGCGC  
TGCTGGAGGGCTACGGCGACGGCGGGTTCGAGGGGGTGAGCACGCTGGTGGACGTGGGAGGC  
AGCTCCGGCGCGTGCCTGGAGATGATCATGCGGCGGGTCCGCACCATCCGGGACGGCGTCAA  
CTTCGACCTGCCCCGACGTCGTGCGGGCGGCGCCGCCATTCCCGGAGTGAGGCATGTTGGCGG  
GGACATGTTCAAGTCCATCCCCTCCGGTGATGCCATCTTCATGAAGTGGGTTCTGACGACATGG  
ACGAACGAGGAGTGACGGCGATCCTGAGCAACTGCCACAAGGCGTGCCGGGCGGCGGGAA  
GGTGATCGCCTGCGAGCCGGTGGTGCCGGACACGACGGACGGCAGCACGAGGACGAGGGCG  
CTGCTGGAGAACGACATCTTCGTATGGCCACCTACCGGACTCAGGGCAGGGAGCGATCCGAG  
GAGGAGTTCCGCCACCTCGGCCTCGCCGCCGGCTTCGCCTCCTTCGGGCCATCTACCTCGACC  
CTTTCTACGCTGTCCTCGAGTACACCAAGTAG

#### **Supplementary seq 12. Amino acid sequences of OsTS**

MGGGGDGELSPAEARLAMMELANMISVPMALTAVIRLGVPKWLWAGGANAPLAAADLLPAGHPD

PSVLERLLRLLASRGVFSEHTGSSSPRRFSLTAVGRTLVPGGGGSPSGSGASYADYVLQHHQDALV  
RAWPLLHEAVLDPSGPEPFARANAGVPAYAYYGKDREANEVMLRAMTGVSEPFMEALLEGYGDGG  
FEGVSTLVDVGGSSGACLEMIMRRVRTIRDGVNFDLPDVVAAAPPIPGVRHVGGDMFKSIPSGDAIF  
MKWVLTTWTNEECTAILS NCHKALPGGGKVIACEPVVDDTDGSTRTRALLENDIFVMATYRTQGRE  
RSEEEFRHLGLAAGFASFRAIYLDPFYAVLEYTK\*
